# Supplementary material
Source: PubMed Central journal article supplement (PMC3222720)
Supplement: NIHMS331059-supplement-1_si_001.pdf [file NIHMS331059-supplement-1_si_001.pdf]

# Supporting Information

## Computational Investigation of DNA Detection using Graphene Nanopores

Chaitanya Sathe, Xueqing Zou, Jean-Pierre Leburton and Klaus Schulten

### Supporting Tables

| Pore Diameter (nm) | KCl Concentration (M) | Temperature (K) | Average RMSD fluctuation of pore mouth ( $\text{\AA}$ ) | Maximum RMSD fluctuation of pore mouth ( $\text{\AA}$ ) |
|--------------------|-----------------------|-----------------|---------------------------------------------------------|---------------------------------------------------------|
| 3                  | 1                     | 295             | 0.72                                                    | 3.3                                                     |
| 3                  | 2                     | 295             | 0.93                                                    | 4.4                                                     |
| 3                  | 1                     | 305             | 1.7                                                     | 4.4                                                     |

Table S1: Breathing fluctuations of graphene around the pore from simulations SimA2, SimA7 and SimA8.

| Applied bias Voltage (V) | Open pore current (nA) | Average blockade current (nA) | Reduction in current (%) | Translocation time (ns) |
|--------------------------|------------------------|-------------------------------|--------------------------|-------------------------|
| 0.8                      | 7.2                    | 3.20                          | 56                       | 27.0                    |
| 2.5                      | 16.0                   | 10.56                         | 34                       | 3.7                     |
| 4.3                      | 25.4                   | 22.30                         | 12                       | 1.6                     |

Table S2: Details of voltage-dependent DNA translocation. This table complements Figure 3. The reduction in current is determined as  $100 - (\text{Average blockade current} / \text{Open pore current}) \times 100$ .

## Supporting Figures

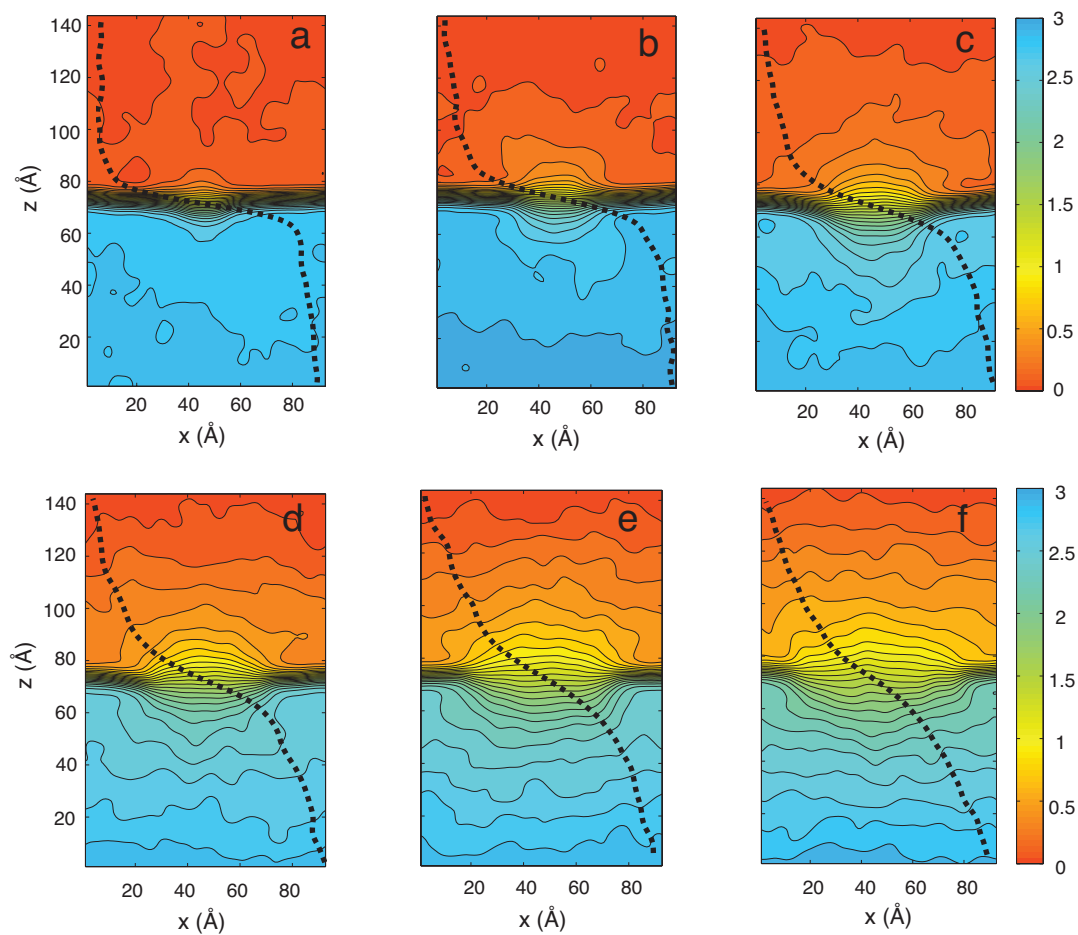

Figure S1: Averaged potential maps along the  $(x, z)$ -plane for pore diameter (a) 2 nm, (b) 3 nm, (c) 4 nm, (d) 5 nm, (e) 6 nm and (f) 7 nm. The dashed line shows the potential change normal to the graphene membrane. This figure complements Figure 2.

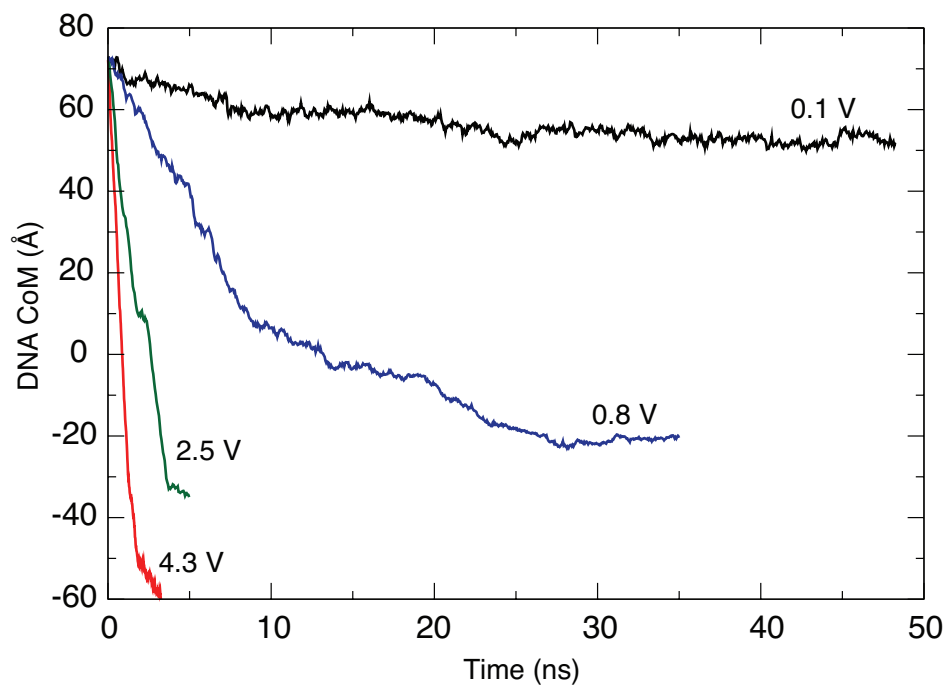

Figure S2: Comparison of DNA center of mass (CoM) motions for various applied bias voltages. This figure complements Figure 2.

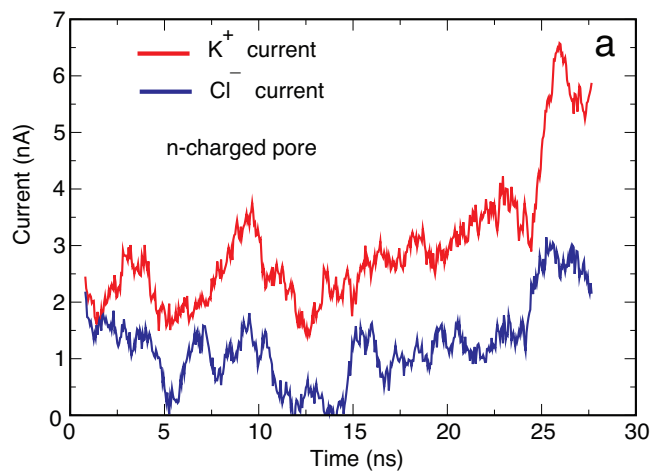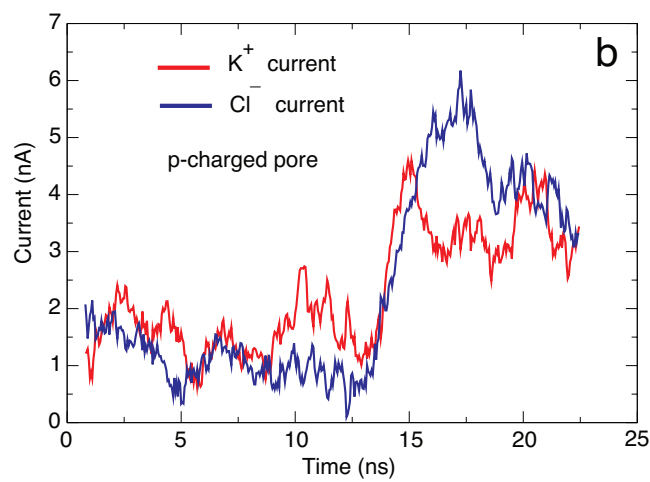

Figure S3: Profiles of  $K^+$  (red line) and  $Cl^-$  (blue line) ion currents for (a) an n-charged pore and (b) a p-charged pore. This figure complements Figure 5a.

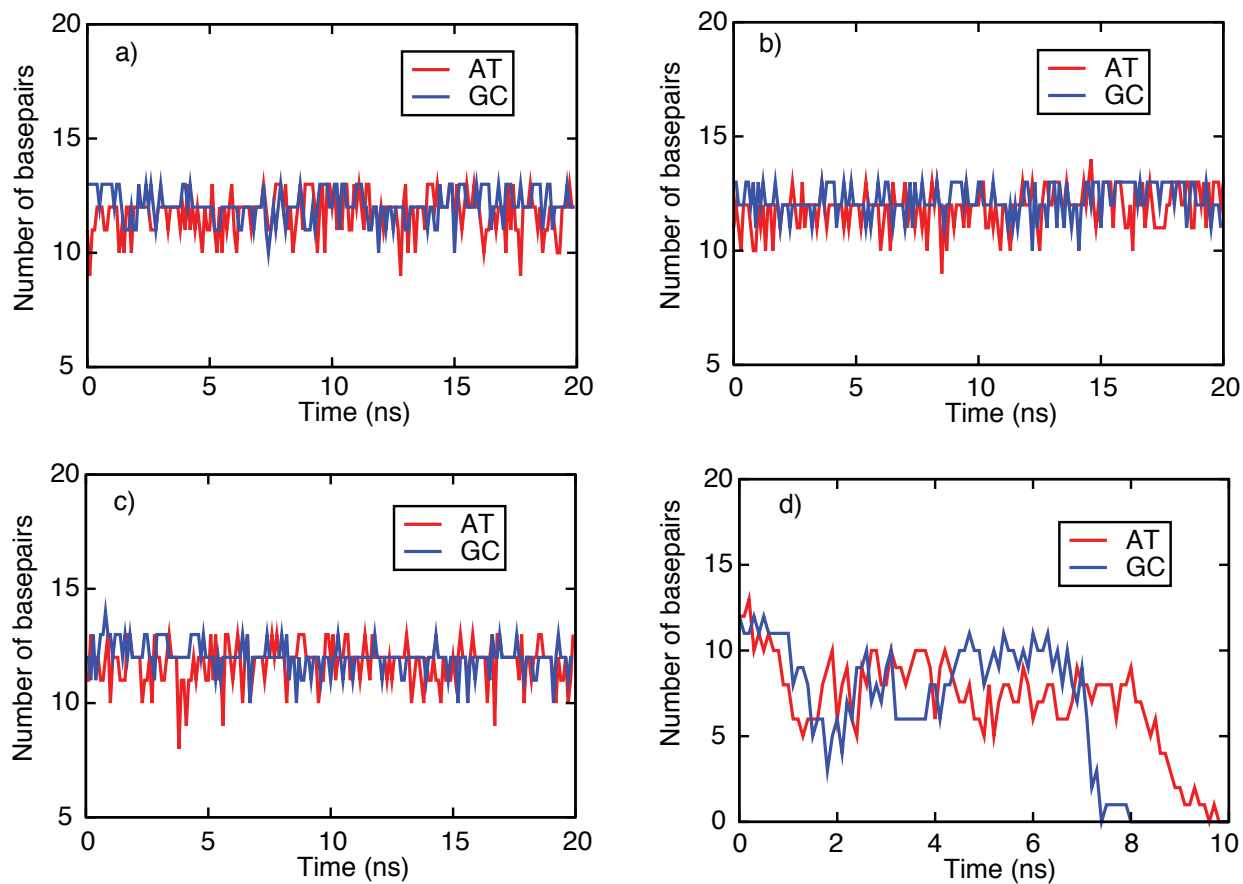

Figure S4: Number of base pairs near the pore mouth ( $\pm 2$  nm) for (a) 0.1 V, (b) 0.3 V, (c) 0.5 V and (d) 1.2 V. This figure complements Figure 6.

**a**

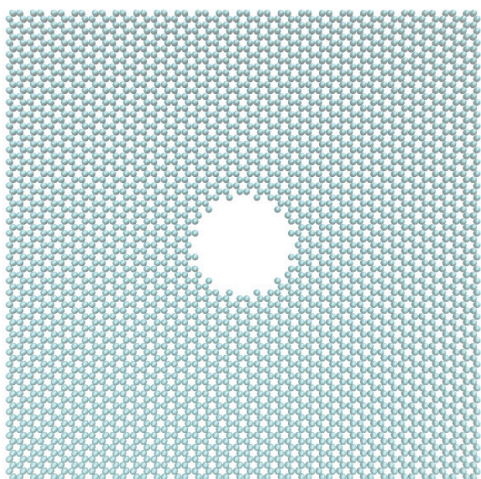

**b**

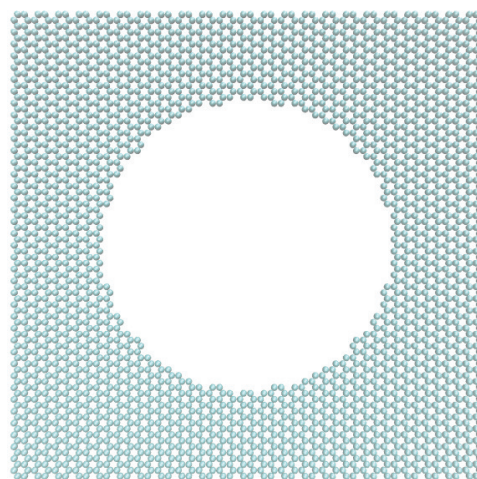

Figure S5: Graphene nanopores with diameters of (a) 2 nm and (b) 6 nm. This figure complements Figure 1.

## Supporting Movies

- **Movie S1** shows the DNA translocation trajectory of simulation SimB1 (see Table 1) at an applied bias voltage of 4.3 V.
- **Movie S2** shows the DNA translocation trajectory of simulation SimB2 (see Table 1) at an applied bias voltage of 2.5 V.
- **Movie S3** shows the DNA translocation trajectory of simulation SimB3 (see Table 1) at an applied bias voltage of 0.8 V.
- **Movie S4** shows the DNA translocation trajectory of simulation SimC (see Table 1).
- **Movie S5** shows the DNA translocation trajectories of simulation SimD1-D2 (see Table 1) through an n-charged (red colored DNA) and a p-charged pore (blue colored DNA).
- **Movie S6** shows the DNA translocation of simulation SimE4 (see Table 1).
- **Movie S7** shows the DNA translocation of simulation SimF4 (see Table 1).
